# Supplementary material
Source: publisher figshare collection journal article supplement (https://acs.figshare.com/ndownloader/files/10283589)

# Supporting Information

## Effects of Zeolitic Parameters and Irradiation on the Retention Properties of Silver Zeolites Exposed to Molecular Iodine

*Bruno Azambre<sup>a\*</sup>, Mouheb Chebbi<sup>a</sup>, Olivia Leroy<sup>b</sup>, Laurent Cantrel<sup>b</sup>*

<sup>a</sup> Laboratoire de Chimie et Physique-Approche Multi-Echelle des Milieux Complexes (LCP-A2MC- EA n°4362), Institut Jean-Barriol FR2843 CNRS, Université de Lorraine, Rue Victor Demange, 57500 Saint-Avold, France.

<sup>b</sup> Institut de Radioprotection et de Sécurité Nucléaire (IRSN), PSN-RES, Saint-Paul Lez Durance, 13115, France.

\*Corresponding Author. E-mail adress: [bruno.azambre@univ-lorraine.fr](mailto:bruno.azambre@univ-lorraine.fr).

**Figure S1: Photo of the EPICUR facility**

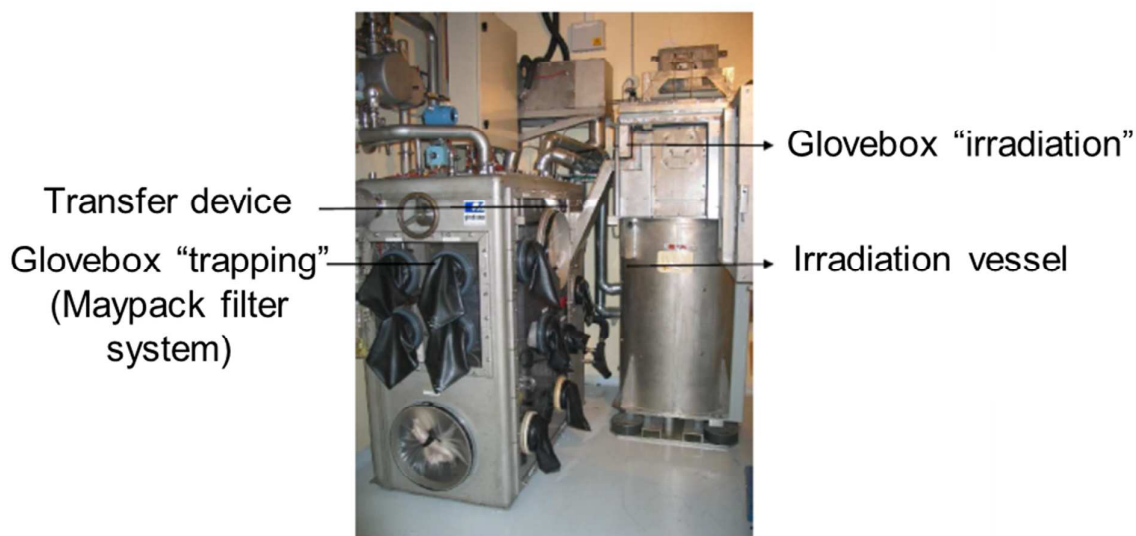

The EPICUR facility consists of an irradiator with six  $^{60}\text{Co}$  sources ( $T_{1/2} = 5.27$  years, 893 TBq in September 2012), an irradiation vessel and a loop, allowing on-line measurements (*W.S. Megaw and F.G. May, The behavior of Iodine release in reactor Containers, J. Nucl. Energy, Parts. A & B; Vol: 16; issue 427, 1962*). The loop contains a sweeping gas and direct  $\gamma$  counting in a May-pack device. The dose rate at the filter location is about 2.2 kGy/h in order to mimic the effect of radiations delivered by fission products in the reactor containment during the accident. Fig. 3 gives the general scheme of the facility. The zeolite loaded with  $\text{I}_2$  is placed in the irradiation vessel (Fig. S1 in ESI). This temperature-controlled irradiation vessel is connected through stainless steel pipes to the May-pack device (iodine filtration system) in such a way that the volatile species produced in the irradiation vessel are transferred to the May-pack device (gas flow path indicated by red arrows in Fig. 3). Prior to entering the May-pack, the gas flow from the irradiation vessel is diluted (green arrows) in order to provide at the May-pack level a fluid velocity and a low humidity ratio compatible with a good efficiency of the May-pack filters. Each gas flow (to the irradiation vessel and dilution) is regulated independently. The gas flow enters the May-pack by the upper side of each filter stage, so that the activity is deposited close to the NaI counters. The May-pack device is connected to a condenser and to a condensed steam vessel in order to collect water which is re-injected into the irradiation vessel at regular intervals if necessary. The irradiation vessel, the condenser, the condensed steam vessel as well as the piping

are made of electro-polished stainless steel in order to minimize iodine deposits. The irradiation vessel, the May-pack device, as well as the gamma counters are placed in a glove box.

In order to quantitative account for the irradiation efficiency, zeolite integrated dose mapping was performed with different dosimetric films in the test configuration.

**Table S1: Experimental matrix for irradiation tests.**

| Parameter                                                       | ZEO1                                            | ZEO2    |
|-----------------------------------------------------------------|-------------------------------------------------|---------|
| Pre-irradiation of the zeolite before I <sub>2</sub> adsorption | No                                              | 2.2 MGy |
| Temperature (°C)                                                | 120                                             |         |
| Pressure (bar)                                                  | 3.5                                             |         |
| Gas composition                                                 | Moist air (R.H of 60%)                          |         |
| Total flow rate (g.h <sup>-1</sup> )                            | 20                                              |         |
| Velocity (cm.s <sup>-1</sup> )                                  | 0.4                                             |         |
| Irradiation duration (h)                                        | 30                                              |         |
| Average dose rate (kGy.h <sup>-1</sup> )                        | Z1 1.6 to 2.0<br>Z2 2.0 to 2.6<br>Z3 2.6 to 4.3 |         |
| Iodine loading (mg/g of zeolite)                                |                                                 |         |
| Z1                                                              | 8.2                                             | 9.3     |
| Z2                                                              | 3.8                                             | 3.1     |
| Z3                                                              | 0.5                                             | 0.4     |

**Figure S2: Effect of preparation method and Si/Al ratio (A1&A2) and of the irradiation (A3&A4) on structural properties and silver speciation within Ag/Y zeolites.**

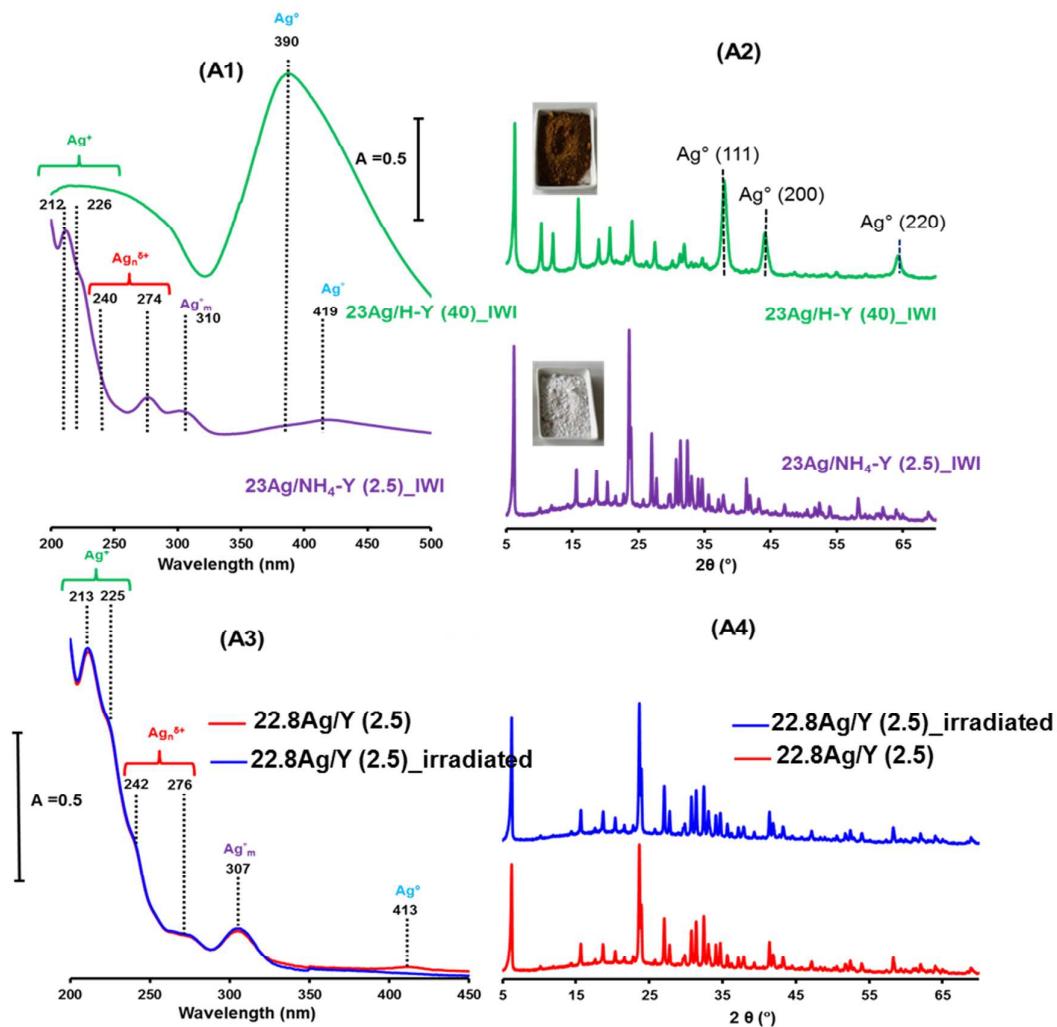

**Figure S3: Experimental illustration by XRD of AgI formation after exposure to  $I_2$  in liquid phase for the commercial sorbent (35Ag/13X<sub>comm</sub> (1.2)).**

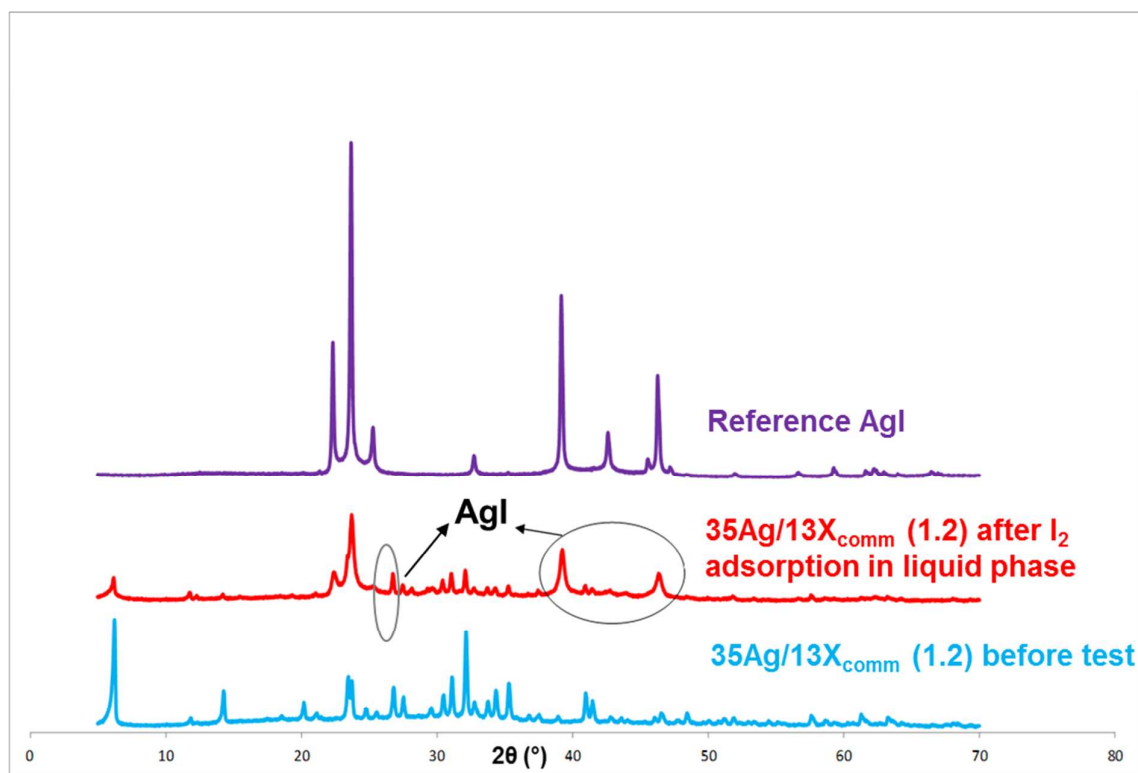

#### S4: (A) Description of the adsorption isotherms models

##### 1. Langmuir model

$$\frac{Q_e}{Q_{max}} = \frac{b \times C_e}{1 + b \times C_e}$$

Where

- $Q_e$  : Adsorption capacity at the equilibrium (mg/g) ;
- $Q_{max}$  : Adsorption capacity at the saturation of the adsorbent (mg/g);
- $C_e$  : Iodine concentration at the equilibrium (mg/L) ;
- $b$  : Langmuir constant (L/mg).

##### 2. Dissociatif Langmuir model

$$\frac{Q_e}{Q_{max}} = \frac{\sqrt{b \times C_e}}{1 + \sqrt{b \times C_e}}$$

##### 3. Temkin model

$$\frac{Q_e}{Q_{max}} = \frac{RT}{\Delta Q} \ln (K_0 C_e)$$

Where

- $R$  : ideal gas constant (8.314 J.K<sup>-1</sup>.mol<sup>-1</sup>) ;
- $T$  : Temperature (K) ;
- $\Delta Q$  : Adsorption energy variation (J.mol<sup>-1</sup>) ;
- $K_0$  : Adsorption constant (L/mg).

**S4: (B) Summary on I<sub>2</sub> adsorption isotherm modeling (T=25°C, 35Ag/13X<sub>comm</sub> (1.2)).**

| Isotherm model       | R <sup>2</sup> | Parameters of modeling                                                                    |
|----------------------|----------------|-------------------------------------------------------------------------------------------|
| Langmuir             | 0.9947         | Q <sub>max</sub> = 280 mg/g<br>b = 0.033 L/mg                                             |
| Dissociatif Langmuir | 0.9953         | Q <sub>max</sub> = 270 mg/g<br>b = 1.187 L/mg                                             |
| Temkin               | 0.9757         | Q <sub>max</sub> = 290 mg/g<br>ΔQ = 38 kJ.mol <sup>-1</sup><br>K <sub>0</sub> = 1288 L/mg |

**Figure S5: Characterization of 4.2Ag/FER (10.4) zeolite before and after I<sub>2</sub> adsorption in liquid phase by DR-UV-Vis (A) and XRD (B).**

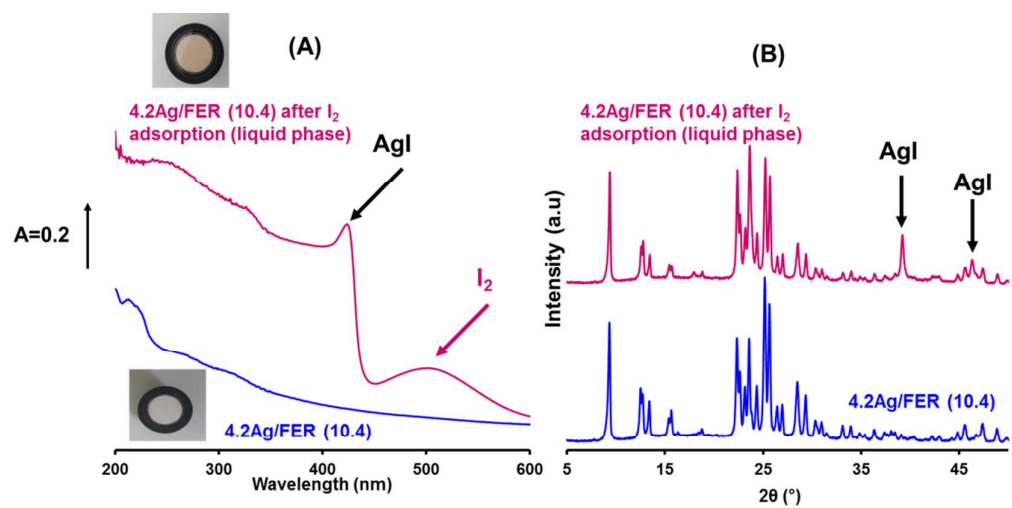

**Figure S6: XRD (A) and DR-UV-Vis (B) characterization of 22.8Ag/Y (2.5) and 23Ag/H-Y (40)<sub>IWI</sub> after I<sub>2</sub> adsorption in gaseous phase ([I<sub>2</sub>]<sub>0</sub>=1250 ppm, T=100°C).**

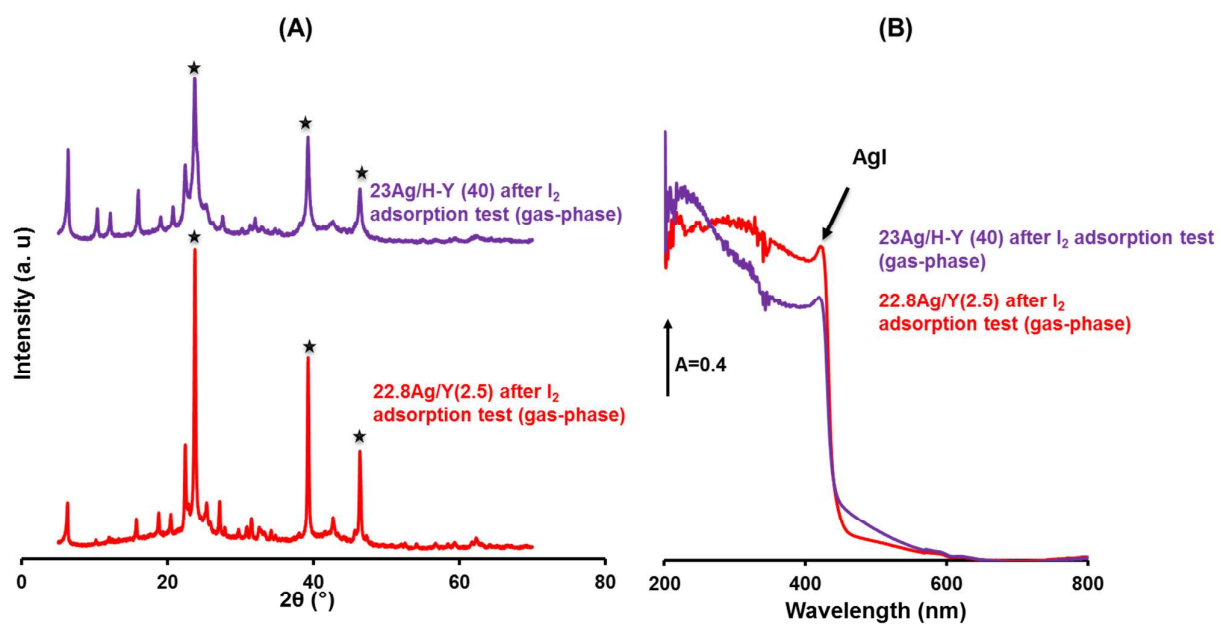

Supplement: Supplementary file 1 [file 10283589]
